# Supplementary material for: High population frequencies of MICA copy number variations originate from independent recombination events
Source: Research Square preprint supplement (doi:10.21203/rs.3.rs-3192282/v1), 2023-08-16
Supplement: Supplementary file 1 [file 2ac9035b8bea87d8f77cb7e6.xlsx]

## Sheet: Sheet1
DKMS_Donor_Center	ethnic_group	count_hemizygous_samples	count_all_samples	percent_hemizygous
CL	Bolivia	9	80	11.25
CL	Peru	30	279	10.7527
US	Mexico	468	5076	9.21986
US	Alaska Native or Aleut	5	57	8.77193
CL	Ecuador	8	116	6.89655
US	Korea	26	391	6.64962
DE	Nepal	4	62	6.45161
DE	Mexico	30	467	6.42398
DE	Angola	7	115	6.08696
DE	Peru	25	447	5.59284
DE	Togo	11	206	5.33981
UK	Malaysia, Vietnam, Philippines, Cambodia, Laos	20	381	5.24934
CL	Uruguay	3	58	5.17241
US	Philippines	25	527	4.74383
DE	Côte d'Ivoire	3	67	4.47761
DE	Ecuador	10	225	4.44444
UK	Caribbean (Black)	54	1243	4.34433
DE	South Korea	19	439	4.32802
UK	Central America, Mestizo	4	93	4.30108
UK	Thailand, Indonesia, Burma	3	70	4.28571
DE	China	37	871	4.24799
CL	Chile Mapuche	48	1212	3.9604
DE	Cameroon	23	601	3.82696
DE	Senegal	5	133	3.7594
DE	Bolivia	5	138	3.62319
CL	Chile Other Indigenous	3	85	3.52941
DE	Guinea	3	94	3.19149
DE	Uruguay	2	67	2.98507
CL	Colombia	14	473	2.95983
CL	Chile Non-Indigenous	2048	69899	2.92994
US	Caribbean (Black)	8	280	2.85714
DE	Mongolia	2	70	2.85714
DE	Malaysia	3	106	2.83019
DE	Ghana	16	570	2.80702
US	Puerto Rico	23	828	2.77778
US	China	23	838	2.74463
DE	Gambia	4	146	2.73973
US	Asia	10	367	2.7248
US	Black	85	3173	2.67885
DE	Indonesia	8	311	2.57235
UK	Asia (East)	4	156	2.5641
US	Africa	15	588	2.55102
UK	Japan, North Korea, South Korea	2	80	2.5
DE	Philippines	21	884	2.37557
DE	Japan	6	259	2.3166
CL	Venezuela	25	1110	2.25225
DE	Hongkong	2	90	2.22222
US	Japan	2	90	2.22222
DE	Mozambique	2	93	2.15054
UK	Africa Sub-Sahara	34	1645	2.06687
DE	Nigeria	13	648	2.00617
DE	Argentina	7	352	1.98864
UK	Jewish	7	359	1.94986
DE	Colombia	13	668	1.94611
UK	China, Taiwan	13	676	1.92308
DE	Chile	8	417	1.91847
UK	South America	14	738	1.89702
DE	Nicaragua	1	55	1.81818
DE	Afghanistan	27	1513	1.78453
DE	Vietnam	28	1574	1.77891
DE	Morocco	32	1809	1.76893
US	Vietnam	6	344	1.74419
DE	Uganda	1	59	1.69492
DE	Cuba	5	296	1.68919
DE	Taiwan	2	121	1.65289
DE	Venezuela	3	192	1.5625
DE	Dominican Republic	3	197	1.52284
DE	Jamaica	1	66	1.51515
CL	Spain	2	139	1.43885
CL	Argentina	5	360	1.38889
US	Cuba	3	226	1.32743
ZA	Black	5	377	1.32626
DE	Brazil	29	2290	1.26638
DE	Israel	3	242	1.23967
DE	Algeria	6	507	1.18343
DE	Tunisia	9	785	1.1465
DE	Thailand	7	673	1.04012
IN	India	268	26537	1.00991
DE	Canada	2	208	0.961538
UK	Pakistan	15	1593	0.94162
US	Asia (South)	33	3548	0.930101
DE	Ukraine	21	2352	0.892857
DE	Pakistan	7	784	0.892857
DE	Montenegro	2	236	0.847458
DE	Congo, Democratic Republic of the	1	121	0.826446
DE	Kenya	2	248	0.806452
DE	Tajikistan	2	255	0.784314
DE	South Africa	2	259	0.772201
DE	USA	15	2012	0.745527
DE	Turkey	273	38731	0.704862
ZA	White	46	6636	0.693189
UK	Turkey	20	2904	0.688705
DE	Moldova	2	292	0.684932
DE	Uzbekistan	2	307	0.651466
DE	Belarus	3	463	0.647948
DE	Palestine	4	620	0.645161
DE	Kyrgyzstan	4	675	0.592593
DE	India	7	1189	0.58873
DE	Egypt	4	719	0.556328
DE	Bulgaria	6	1079	0.55607
DE	Jordan	1	180	0.555556
DE	Russia	85	16162	0.525925
DE	Kazakhstan	39	7577	0.514716
DE	Ireland	2	393	0.508906
UK	Bangladesh	2	409	0.488998
DE	Slovakia	3	644	0.465839
DE	Ethiopia	1	243	0.411523
DE	Hungary	8	2309	0.34647
DE	Spain	9	2784	0.323276
DE	Syria	17	5370	0.316574
DE	Portugal	7	2260	0.309735
DE	Latvia	1	327	0.30581
DE	Sri Lanka	2	690	0.289855
PL	Poland	944	365946	0.257962
DE	Poland	55	21946	0.250615
DE	Romania	12	4831	0.248396
DE	Italy	23	9844	0.233645
US	Caribbean (White)	2	920	0.217391
US	White/Caucasian	55	26086	0.210841
DE	Iran	6	3182	0.188561
DE	Iraq	2	1062	0.188324
DE	Switzerland	2	1120	0.178571
DE	Serbia	4	2337	0.17116
DE	Lithuania	1	589	0.169779
DE	Slovenia	1	607	0.164745
UK	Scotland	41	25247	0.162396
DE	Bosnia and Herzegovina	5	3117	0.160411
DE	Belgium	1	642	0.155763
DE	Austria	6	3909	0.153492
DE	Greece	6	4344	0.138122
DE	North Macedonia	1	730	0.136986
UK	Northern Ireland	27	19753	0.136688
DE	Croatia	6	4597	0.13052
DE	France	3	2336	0.128425
DE	Germany	1413	1112816	0.126975
UK	Great Britain/Ireland	344	274746	0.125207
DE	Great Britain	2	1646	0.121507
UK	Wales	23	20318	0.1132
DE	Czech Republic	2	1922	0.104058
DE	Kosovo	2	2022	0.098912
DE	Netherlands	2	2255	0.0886918
DE	Lebanon	1	1248	0.0801282
DE	Albania	1	1325	0.0754717
CL	Cuba		64
CL	Brazil		114
DE	Somalia		131
DE	Finland		375
DE	Sudan		99
DE	Armenia		339
DE	Georgia		244
DE	Paraguay		94
DE	Sierra Leone		97
DE	El Salvador		55
DE	Bangladesh		94
DE	Guatemala		62
DE	Costa Rica		62
DE	Norway		157
DE	Denmark		390
DE	Australia		143
DE	Yemen		72
DE	Sweden		369
DE	Luxembourg		375
DE	Burundi		57
DE	Azerbaijan		231
DE	Cyprus		86
DE	Mauritius		56
DE	Eritrea		510
DE	Turkmenistan		67
DE	Namibia		53
DE	Estonia		146
DE	New Zealand		57
UK	Republic of Ireland		3113
UK	Greece		734
