# Supplementary material for: High population frequencies of MICA copy number variations originate from independent recombination events
Source: Research Square preprint supplement (doi:10.21203/rs.3.rs-3192282/v1), 2023-08-16
Supplement: Supplementary file 2 [file 31ba6a3eecbba26b8a6c7a2d.xlsx]

## Sheet: Tabelle1
SNP	position_GRCh38.p14_MICA	position_GRCh38.p14_MICB
0	chr6:31388948	chr6:31485927
1	chr6:31388949	chr6:31485928
33	chr6:31388981	chr6:31485960
60	chr6:31389008	chr6:31485987
736	chr6:31389684	chr6:31486663
936	chr6:31389884	chr6:31486863
1101	chr6:31390049	chr6:31486964
1507	chr6:31390455	chr6:31487370
1508	chr6:31390456	chr6:31487371
1510	chr6:31390458	chr6:31487373
1519	chr6:31390467	chr6:31487382
1566	chr6:31390514	chr6:31487429
1577	chr6:31390525	chr6:31487440
1608	chr6:31390556	chr6:31487471
1672	chr6:31390620	chr6:31487535
1725	chr6:31390673	chr6:31487588
1757	chr6:31390705	chr6:31487620
1779	chr6:31390727	chr6:31487642
1969	chr6:31390917	chr6:31487832
1990	chr6:31390938	chr6:31487853
1997	chr6:31390945	chr6:31487860
2032	chr6:31390980	chr6:31487895
2159	chr6:31391107	chr6:31488022
2174	chr6:31391122	chr6:31488037
2189	chr6:31391137	chr6:31488052
2250	chr6:31391198	chr6:31488099
2298	chr6:31391246	chr6:31488147
2741	chr6:31391689	chr6:31488590
2855	chr6:31391803	chr6:31488704
2867	chr6:31391815	chr6:31488716
