# Supplementary material for: High population frequencies of MICA copy number variations originate from independent recombination events
Source: Research Square preprint supplement (doi:10.21203/rs.3.rs-3192282/v1), 2023-08-16
Supplement: Supplementary file 3 [file b7f9f43fceaf9ed9f222e3cd.xlsx]

## Sheet: Sheet1
HLA-B	n_hemizygous	n_all	percent_hemizygous
48:02:01	93	93	100
39:13:02	14	14	100
48:07	5	5	100
48:06	2	2	100
07:ARBNB	1	1	100
15:68	1	1	100
48:01:08	1	1	100
48:13	1	1	100
48:28	1	1	100
48:DEFGW	1	1	100
55:28	1	1	100
48:04:01G	137	141	97.1631
48:01:01G	5752	5962	96.4777
48:03:01G	122	128	95.3125
15:16:01G	1671	1780	93.8764
48:39	52	56	92.8571
48:12	10	13	76.9231
15:150	1	2	50
35:04:02	1	2	50
35:01:11	1	3	33.3333
39:22	1	4	25
40:40:01G	1	4	25
51:205	2	11	18.1818
18:19	1	6	16.6667
40:11:01G	5	35	14.2857
56:02:01	1	7	14.2857
35:28:01G	3	22	13.6364
35:55	1	9	11.1111
35:04:01G	33	323	10.2167
44:116	1	11	9.09091
51:75	1	14	7.14286
39:01:04	1	17	5.88235
35:14:01G	5	86	5.81395
59:01:01G	3	55	5.45455
35:17:01G	19	365	5.20548
15:40:01	1	20	5
51:13:01	3	63	4.7619
15:38:01	1	21	4.7619
39:02:02G	8	176	4.54545
15:30:01G	8	188	4.25532
40:10:01G	2	49	4.08163
15:15:01G	10	246	4.06504
39:01:19	1	25	4
56:02:01G	1	25	4
39:13:01	5	127	3.93701
35:10	7	185	3.78378
40:16:01G	2	54	3.7037
35:12:01G	25	677	3.69276
15:20	2	59	3.38983
40:08	8	246	3.25203
07:02:10	1	31	3.22581
39:12:01G	4	127	3.14961
35:XXX	1	33	3.0303
40:07	1	33	3.0303
15:04:01G	25	855	2.92398
39:05:01G	53	1851	2.86332
40:13	3	110	2.72727
52:01:02G	49	1949	2.51411
51:31	2	80	2.5
15:27:01	2	82	2.43902
51:02:02	2	83	2.40964
40:04:01	16	703	2.27596
44:09	1	44	2.27273
35:11:01	1	45	2.22222
39:08	3	139	2.15827
40:05:01G	3	140	2.14286
35:43:01G	24	1138	2.10896
35:20:01	35	1679	2.08457
39:09:01G	348	17460	1.99313
35:21	3	151	1.98675
39:06:02G	413	20841	1.98167
35:09:01	107	5512	1.94122
35:16	1	52	1.92308
35:05:01G	45	2366	1.90194
14:03	3	160	1.875
39:03:01G	12	672	1.78571
27:08	3	168	1.78571
40:50:01G	1	60	1.66667
51:02:01G	7	424	1.65094
44:10	1	63	1.5873
78:01:01G	7	447	1.566
40:23	2	130	1.53846
81:01:01G	12	792	1.51515
15:35	6	400	1.5
27:04:01G	7	476	1.47059
38:02:02G	1	68	1.47059
15:XXX	1	72	1.38889
13:01:01G	42	3080	1.36364
39:14:01G	2	148	1.35135
54:01:01G	12	928	1.2931
39:11	1	79	1.26582
15:25:01G	10	797	1.25471
58:02:01G	20	1633	1.22474
51:01:02G	3	245	1.22449
35:22:01G	1	82	1.21951
35:19	3	248	1.20968
56:04:01G	1	87	1.14943
55:02:01G	7	615	1.13821
46:01:01G	29	2573	1.12709
18:05:01G	5	444	1.12613
38:02:01G	21	1877	1.11881
15:21:01G	3	274	1.09489
07:03	1	92	1.08696
39:06:01	3	277	1.08303
27:10	2	212	0.943396
15:10:01G	21	2274	0.923483
14:02:02	1	109	0.917431
27:06:01G	2	221	0.904977
07:09:01	2	225	0.888889
42:02:01G	8	908	0.881057
35:06	3	344	0.872093
15:02:01G	31	3582	0.865438
15:03:01G	66	7631	0.864893
27:03	7	810	0.864198
39:10:01G	8	927	0.862999
15:11:01G	2	245	0.816327
15:39:01G	5	618	0.809061
40:DUKCK	1	126	0.793651
44:08	1	133	0.75188
41:01:01G	161	21840	0.737179
51:09:01G	6	844	0.7109
53:01:01G	104	16642	0.624925
57:03:01G	25	4194	0.59609
44:03:02G	53	9636	0.550021
45:01:01G	123	22430	0.548373
42:01:01G	13	2585	0.502901
15:13:01	1	199	0.502513
27:12:01G	2	411	0.486618
40:06:01G	64	13211	0.484445
15:08:01	6	1269	0.472813
15:05:01	3	662	0.453172
52:04	1	222	0.45045
44:29:01G	2	445	0.449438
73:01:01G	9	2164	0.415896
07:14:01	1	241	0.414938
58:01:01G	156	37928	0.411306
44:06	1	255	0.392157
35:02:01G	140	36273	0.385962
40:02:01G	225	63882	0.352212
52:01:01G	173	51179	0.338029
14:02:01G	281	83909	0.334887
50:02:01G	5	1515	0.330033
18:03:01G	14	4262	0.328484
57:02:01G	4	1229	0.325468
15:17:01G	56	17355	0.322674
07:05:01G	51	15904	0.320674
67:01:02G	1	314	0.318471
39:24:01	6	1890	0.31746
49:01:01G	190	62602	0.303505
27:07:01G	7	2321	0.301594
51:06:01	2	689	0.290276
14:01:01G	78	28590	0.272823
50:01:01G	128	47897	0.26724
15:34:01	1	380	0.263158
51:08:01G	14	5329	0.262713
51:01:01G	573	229563	0.249605
39:01:01G	131	53109	0.246663
35:01:01G	557	227844	0.244466
07:02:01G	1216	506342	0.240154
41:02:01G	63	26290	0.239635
15:07:01G	5	2088	0.239464
35:08:01G	54	22772	0.237133
38:01:01G	212	90778	0.233537
44:03:01G	411	178240	0.230588
27:05:03	6	2621	0.22892
47:01:01G	28	12375	0.226263
35:03:01G	202	95316	0.211927
18:01:01G	421	208260	0.202151
15:18:01G	18	8943	0.201275
37:01:01G	104	55481	0.187452
51:05	3	1605	0.186916
55:01:01G	119	63922	0.186164
13:02:01G	252	136336	0.184837
15:01:01G	469	258106	0.181708
57:01:01G	253	139886	0.180862
08:01:02	1	556	0.179856
40:01:01G	298	185221	0.160889
08:01:01G	662	425104	0.155727
27:05:02G	222	146516	0.151519
44:02:01G	477	321893	0.148186
44:05:01G	24	19562	0.122687
15:24:01	2	1648	0.121359
56:01:01G	41	35286	0.116193
07:04:01	5	4332	0.11542
40:DEFZZ	1	984	0.101626
51:07:01	3	3090	0.0970874
15:09:01G	1	1321	0.0757002
27:02:01G	22	30326	0.072545
44:04	1	2166	0.0461681
40:DEHAB		857
40:BZDHF		840
40:BZDHH		840
40:CKCVP		700
40:CKCVS		700
27:09		492
27:14		472
07:10		441
15:29:01G		412
15:CKDZF		366
35:41		349
47:02		307
39:31:01G		293
35:02:02		211
08:09		210
15:33		200
15:DEHSG		193
18:04:01		193
15:32:01G		173
15:BZFFW		165
08:18		161
15:BZFFZ		159
15:12:01G		153
07:15		146
08:01:04		145
15:CKDZH		140
15:23		132
27:01		124
51:22		116
07:47		112
07:07:01G		108
18:18:01G		107
18:02:01		99
37:02		99
40:12:01		97
82:01:01G		93
15:82		91
15:71		89
57:04:01		81
40:01:04		78
47:03		77
67:01:01		70
15:73:01G		65
18:07:01		64
18:14		64
44:XXX		64
15:135		61
15:63		60
07:02:03		57
07:XXX		56
15:125:01		55
53:05:01		55
78:02:02		54
15:17:02		52
40:27:01		52
15:31:01G		50
27:XXX		50
51:50		50
37:04:01		49
40:64:01G		48
35:29:01		47
40:03:01G		45
13:08		44
15:125		44
35:30:01G		44
08:24		43
82:02:01G		43
18:01:02		42
38:09		42
40:26		40
40:32		40
07:26		39
42:05:01		39
51:19		39
55:01:02		39
07:62		38
18:28		38
40:42		38
40:01:03G		37
51:XXX		37
15:01:10		36
35:77		36
27:51		35
51:65		35
15:45		34
35:36		34
41:06		34
53:CDSXZ		34
15:78:01G		33
07:22:01		32
40:XXX		32
15:65		31
35:321		31
35:31		30
39:15		30
08:XXX		29
15:37		29
35:DEHAC		29
07:38		28
37:01:03		28
44:21		28
15:01:02		26
15:DURJU		26
27:85		26
35:DCHCY		25
57:01:02		25
18:09		24
51:38		24
08:12:01		23
15:153		23
18:XXX		23
35:CKAVK		23
44:17		23
15:14:01G		22
35:01:05		22
44:15:01G		22
51:20		22
51:43		22
35:09:02		21
53:06		21
07:16		20
15:06		20
37:XXX		20
55:01:04		20
07:05:02		19
08:20:01		19
27:19:01G		19
39:XXX		19
51:01:19		19
07:08:01		18
07:20		18
07:252		18
15:110		18
27:17		18
35:65Q		18
35:BMMKP		18
35:BZUVR		18
55:04		18
55:09		18
56:27		18
57:XXX		18
15:75		17
35:14:02		17
40:94		17
55:25		17
07:88		16
35:27		16
35:32:01		16
35:38		16
39:20		16
41:03:01		16
49:XXX		16
50:CKXGJ		16
51:14		16
07:272N		15
08:33		15
14:10		15
15:01:14		15
18:20		15
27:05:07		15
35:08:02		15
35:13		15
40:20:01G		15
40:49		15
44:JFVN		15
51:69		15
52:06:02		15
07:02:04		14
07:02:07		14
07:87		14
13:03		14
15:122		14
15:123:01G		14
18:34		14
35:23		14
35:99		14
07:02:27		13
07:51		13
07:92		13
14:06:01		13
14:20		13
18:06		13
35:100		13
35:68:02		13
38:XXX		13
42:07		13
44:BZVUD		13
44:CYVH		13
49:CWTKE		13
55:05		13
07:33:01		12
07:63		12
14:XXX		12
15:01:04		12
27:05:09		12
35:15:01		12
35:CDHJG		12
44:41:01		12
44:76		12
51:26		12
51:61:01		12
55:17		12
56:03		12
58:05		12
07:02:13		11
07:48		11
08:15		11
08:25		11
08:35		11
15:173		11
15:79N		11
18:08		11
27:05:18G		11
40:14:02		11
40:14:03		11
40:31		11
44:03:19		11
44:07		11
51:01:04		11
55:01:06		11
07:18:01		10
07:68:01		10
08:28		10
15:142		10
15:164		10
18:12:01		10
18:40		10
35:37		10
38:12		10
38:31		10
39:07		10
39:155		10
40:02:06		10
44:32		10
44:DFBMH		10
51:10		10
51:68		10
55:01:05		10
56:25		10
07:07		9
07:37:01G		9
07:42		9
07:96:01		9
07:98		9
08:07		9
08:23		9
13:XXX		9
15:113		9
15:147		9
15:47:01		9
15:55		9
18:07:02		9
18:25		9
27:05:08		9
35:247		9
35:BPJKN		9
52:25:01		9
53:BPJKR		9
08:01:08		8
08:71		8
14:07N		8
15:132		8
15:157		8
15:181N		8
15:67		8
35:03:02		8
35:136		8
35:49:01		8
37:04:02		8
37:17		8
38:01:06		8
39:26		8
44:23N		8
44:86		8
51:34		8
52:11		8
57:15		8
58:18		8
07:102		7
07:73		7
07:74		7
08:01:03		7
08:14		7
08:37		7
13:10		7
14:06:02		7
15:51		7
18:01:06		7
18:13		7
18:33		7
27:05:34		7
35:106		7
35:178		7
37:01:20		7
38:17		7
40:02:14		7
40:201		7
40:72:02		7
44:177		7
44:91		7
46:CKSXG		7
49:09		7
51:01:09		7
51:134		7
51:83		7
55:11		7
56:01:02		7
56:16		7
56:XXX		7
57:14:01		7
07:02:21		6
07:109		6
07:136:01		6
07:22:02		6
07:23		6
07:67N		6
08:01:07		6
08:02		6
08:161		6
14:05		6
15:117		6
15:160:01G		6
15:58		6
15:70		6
18:01:10		6
27:30		6
27:82		6
35:132		6
35:20:02		6
35:24:01		6
35:44		6
35:45		6
40:01:07		6
40:114:01G		6
40:117		6
40:30		6
40:79		6
44:02:07		6
44:02:09		6
44:146		6
44:48		6
44:74		6
44:80		6
44:CXHGZ		6
51:01:03		6
51:49		6
51:70		6
57:21		6
57:40		6
58:XXX		6
07:02:12		5
07:02:43		5
07:174		5
07:95		5
08:01:06		5
08:110		5
08:63		5
13:02:04		5
13:45		5
14:02:03		5
15:154		5
15:46		5
15:BZWDG		5
18:11		5
18:15		5
27:49		5
35:01:19		5
35:395		5
37:03N		5
37:21		5
38:13		5
39:04		5
40:295		5
41:07		5
44:02:02		5
44:02:34		5
44:03:13		5
44:221		5
44:31		5
44:34:01		5
44:45		5
44:73		5
44:87		5
44:96		5
51:01:10		5
51:117		5
51:158:02		5
51:21		5
51:67		5
51:87		5
52:01:07		5
52:02:01		5
55:03		5
55:12		5
55:29		5
55:45		5
55:XXX		5
56:15		5
57:44		5
57:58		5
07:02:05		4
07:02:67		4
07:122		4
07:24		4
07:55		4
07:57		4
07:94		4
08:01:05		4
08:01:10		4
08:04:01		4
08:11		4
08:21		4
08:34		4
08:41		4
13:49N		4
14:13		4
14:29		4
15:01:35		4
15:03:03		4
15:190N		4
15:240		4
15:48		4
15:69		4
27:05:05		4
27:05:21		4
27:46		4
35:105		4
35:242		4
35:34		4
35:61:01		4
35:DPFDF		4
37:06:01		4
39:01:10		4
39:32		4
40:01:21		4
40:108		4
40:126		4
40:38		4
40:43		4
40:DEHHK		4
41:16		4
41:XXX		4
44:02:06		4
44:173		4
44:64:02		4
44:68		4
44:77		4
44:92		4
44:DEHHJ		4
44:DUKVJ		4
48:05		4
50:XXX		4
51:06:02		4
51:15		4
53:XXX		4
55:07		4
57:01:07		4
57:01:10		4
58:23		4
78:04		4
07:02:17		3
07:13		3
07:195		3
08:01:13		3
08:120		3
08:13		3
08:39		3
08:50		3
08:52		3
14:08:01		3
14:19		3
15:01:12		3
15:01:15		3
15:141		3
15:167		3
15:174		3
15:248		3
15:53		3
15:57		3
15:97		3
18:01:20		3
18:01:30		3
18:113		3
18:26		3
27:101		3
27:148		3
27:23		3
27:25		3
27:34		3
27:47		3
27:48		3
27:56		3
27:70		3
27:83		3
35:02:06		3
35:351		3
35:68:01		3
35:74		3
35:85		3
37:09		3
37:10		3
37:48		3
39:01:05		3
39:01:08		3
39:102		3
39:123		3
39:40:01N		3
39:57		3
39:65		3
40:102		3
40:103		3
40:111		3
40:113		3
40:170		3
40:19		3
40:199		3
40:372N		3
40:87:01		3
40:90		3
40:99		3
41:11		3
44:02:10		3
44:02:18		3
44:02:22		3
44:03:11		3
44:115		3
44:120		3
44:122		3
44:13		3
44:152		3
44:212		3
44:22		3
44:25		3
44:37:01		3
44:46		3
44:70		3
44:DEHTZ		3
45:XXX		3
46:BZUVX		3
49:CETGF		3
50:08		3
50:09		3
51:04:01		3
51:09:02		3
51:107		3
51:147		3
51:175		3
51:24:03		3
51:46		3
51:56:03		3
51:74		3
51:76		3
51:78:01		3
51:BNTCY		3
51:BZVFT		3
51:CKAVX		3
53:24		3
53:DEHTX		3
54:XXX		3
55:CKAVT		3
56:01:03		3
56:01:12		3
57:24		3
57:48		3
67:02:01G		3
07:02:02		2
07:02:08		2
07:02:28		2
07:02:34		2
07:02:48		2
07:114		2
07:12		2
07:127		2
07:143		2
07:163		2
07:188		2
07:21		2
07:217		2
07:236		2
07:261		2
07:31		2
07:36		2
07:41		2
07:52		2
07:56:01		2
07:56:02		2
07:86		2
08:01:22		2
08:01:36		2
08:111		2
08:12:03		2
08:132		2
08:30N		2
08:47		2
08:86N		2
13:02:06		2
13:02:10		2
13:11		2
13:14		2
13:140		2
13:15		2
14:18		2
14:23		2
15:01:08		2
15:01:16		2
15:01:21		2
15:101		2
15:128		2
15:170		2
15:172		2
15:175		2
15:18:02		2
15:206		2
15:211		2
15:27:02		2
15:309		2
15:333		2
15:377Q		2
15:39:02		2
15:406		2
15:432		2
15:498		2
15:52		2
15:54		2
15:78:02		2
15:80		2
15:89:01		2
15:CKDZE		2
15:CZKMN		2
18:147		2
18:37:01		2
18:49		2
18:60		2
18:69		2
27:05:24		2
27:118		2
27:137		2
27:140		2
27:146		2
27:20		2
27:26		2
27:32		2
27:35		2
27:53		2
27:78		2
27:80		2
35:01:29		2
35:02:04		2
35:08:12		2
35:104		2
35:116		2
35:124		2
35:144		2
35:167		2
35:174		2
35:193		2
35:199		2
35:204		2
35:208:01		2
35:240		2
35:262		2
35:263		2
35:285		2
35:396		2
35:452		2
35:47		2
35:48		2
35:58		2
35:81		2
35:95		2
37:01:02		2
37:74		2
38:01:07		2
38:03		2
39:01:09		2
39:01:14		2
39:02:01G		2
39:19:01		2
39:28		2
39:29		2
39:62		2
39:74		2
39:93		2
40:01:05		2
40:01:18		2
40:01:23		2
40:01:43		2
40:11:02		2
40:12		2
40:125:01		2
40:148		2
40:157		2
40:168		2
40:183		2
40:197		2
40:198		2
40:203		2
40:22N		2
40:318		2
40:35:01		2
40:46		2
40:47		2
40:52		2
40:CKCVN		2
40:CKCVR		2
41:01:05		2
41:10		2
41:19		2
44:02:05		2
44:02:24		2
44:02:32		2
44:02:33		2
44:02:40		2
44:03:22		2
44:14		2
44:18		2
44:188		2
44:209		2
44:259		2
44:28:01		2
44:28:02		2
44:288		2
44:30		2
44:308		2
44:333N		2
44:36		2
44:50:01		2
44:51		2
44:65		2
44:67		2
44:AYEE		2
44:BNGGP		2
44:FSVJ		2
47:08		2
49:10		2
49:16		2
50:04		2
50:07		2
50:12		2
50:52		2
51:01:37		2
51:01:40		2
51:01:42		2
51:105		2
51:109		2
51:115		2
51:122		2
51:13:02		2
51:17		2
51:177		2
51:190		2
51:200		2
51:24:04		2
51:73		2
51:82		2
51:CKAVY		2
51:CWYCT		2
52:10:01		2
52:25:02		2
52:CJZMT		2
52:XXX		2
53:04		2
53:10		2
55:01:15		2
55:20		2
55:33		2
55:CKAVU		2
56:01:05		2
56:10		2
56:13		2
56:34		2
56:58		2
56:66		2
57:01:04		2
57:01:06		2
57:01:20		2
57:05		2
57:11		2
57:131		2
57:20		2
57:23		2
57:31		2
57:32		2
57:71		2
58:08:01		2
07:02:11		1
07:02:36		1
07:02:44		1
07:05:05		1
07:07:02		1
07:104		1
07:105		1
07:112		1
07:134		1
07:147		1
07:149		1
07:151:01		1
07:152		1
07:153		1
07:160		1
07:162		1
07:167N		1
07:17		1
07:173		1
07:175		1
07:179		1
07:19		1
07:193		1
07:216		1
07:237		1
07:239		1
07:241		1
07:248		1
07:255		1
07:265		1
07:266		1
07:277		1
07:280		1
07:287		1
07:288		1
07:29		1
07:300		1
07:303:02		1
07:310		1
07:316N		1
07:347		1
07:350		1
07:357		1
07:39		1
07:54		1
07:68:03		1
07:71		1
07:77		1
07:83		1
07:90		1
07:91		1
07:93		1
07:96:02		1
07:CGXSM		1
07:CXACV		1
07:DETZF		1
08:01:16		1
08:01:17		1
08:01:21		1
08:01:25		1
08:01:31		1
08:01:33		1
08:03		1
08:104		1
08:108		1
08:112		1
08:113		1
08:129		1
08:130		1
08:135		1
08:136		1
08:137		1
08:138		1
08:143		1
08:147		1
08:156		1
08:162		1
08:165		1
08:170		1
08:172		1
08:180		1
08:186		1
08:22		1
08:26:01		1
08:31		1
08:43		1
08:59:01		1
08:59:02		1
08:62		1
08:65		1
08:70		1
08:78		1
08:88		1
08:92		1
08:95		1
08:97		1
08:CEFFH		1
08:CXABC		1
13:01:10		1
13:02:02		1
13:02:03		1
13:02:15		1
13:02:17		1
13:02:26		1
13:113		1
13:119		1
13:133		1
13:22:02		1
13:30		1
13:53		1
13:57		1
13:65		1
13:66		1
14:01:04		1
14:02:07		1
14:02:16		1
14:14		1
14:31		1
14:36		1
14:63		1
14:95		1
15:01:03		1
15:01:09		1
15:01:18		1
15:01:31		1
15:01:53		1
15:01:55		1
15:04:02		1
15:05:02		1
15:106		1
15:108		1
15:116		1
15:125:02		1
15:162		1
15:171		1
15:18:03		1
15:18:04		1
15:193		1
15:197:02		1
15:204		1
15:207		1
15:212		1
15:225		1
15:231		1
15:232		1
15:251:01		1
15:251:03		1
15:252		1
15:275:02		1
15:288		1
15:289		1
15:290		1
15:294N		1
15:346		1
15:353		1
15:360		1
15:364		1
15:371		1
15:373		1
15:389		1
15:409		1
15:415		1
15:42		1
15:430		1
15:44		1
15:448		1
15:452		1
15:484		1
15:520Q		1
15:523		1
15:64:01		1
15:64:02		1
15:72		1
15:76		1
15:78:03		1
15:83		1
15:87		1
15:89		1
15:AUSKV		1
15:BZBTW		1
15:CEFER		1
15:DEHDN		1
18:01:09		1
18:01:12		1
18:01:23		1
18:115		1
18:117		1
18:138N		1
18:142		1
18:157:01G		1
18:29		1
18:31		1
18:36		1
18:43		1
18:44:01		1
18:73		1
18:98		1
27:05:15		1
27:05:23		1
27:05:25		1
27:05:27		1
27:05:33		1
27:121		1
27:123		1
27:126		1
27:142		1
27:143		1
27:157		1
27:161		1
27:177		1
27:202		1
27:209		1
27:31		1
27:41		1
27:43		1
27:45		1
27:55		1
27:57		1
27:60		1
27:72		1
27:73		1
27:90:01		1
27:90:04		1
27:91		1
27:96:01		1
27:98		1
27:BYMSH		1
35:01:02		1
35:01:06		1
35:01:07		1
35:01:10		1
35:01:14		1
35:01:34		1
35:01:42		1
35:01:54		1
35:01:55		1
35:01:56		1
35:01:64		1
35:02:03		1
35:02:10		1
35:03:09		1
35:03:19		1
35:03:25		1
35:08:04		1
35:08:05		1
35:08:06		1
35:103		1
35:107		1
35:129N		1
35:130N		1
35:135		1
35:150:02		1
35:158		1
35:159		1
35:160		1
35:163		1
35:165N		1
35:171		1
35:175		1
35:18		1
35:180		1
35:181		1
35:182		1
35:183		1
35:210		1
35:211		1
35:215		1
35:221		1
35:228		1
35:248		1
35:25		1
35:259		1
35:266		1
35:278		1
35:280		1
35:289		1
35:311		1
35:313		1
35:320		1
35:337:02		1
35:407		1
35:412		1
35:42:02		1
35:424		1
35:437		1
35:59:01		1
35:64:02		1
35:87		1
35:90		1
35:93		1
35:CDHJF		1
35:CEFEV		1
35:DGKCT		1
35:DSNK		1
35:DSZW		1
37:01:07		1
37:06:02		1
37:07		1
37:16Q		1
37:34		1
37:42N		1
38:01:08		1
38:04		1
38:11		1
38:14		1
38:24		1
38:33		1
38:BNRYP		1
39:01:07		1
39:01:20		1
39:09:02		1
39:111		1
39:24:02		1
39:33		1
39:34		1
39:37		1
39:49		1
39:51		1
39:52		1
39:61		1
39:64		1
39:69		1
39:75		1
39:78		1
39:CZXRS		1
40:01:20		1
40:01:22		1
40:01:24		1
40:01:27		1
40:01:32		1
40:01:63		1
40:02:08		1
40:02:15		1
40:02:16		1
40:06:10		1
40:06:19		1
40:09		1
40:105		1
40:114:01		1
40:115		1
40:129		1
40:142N		1
40:145		1
40:160:01		1
40:18		1
40:200		1
40:213		1
40:217		1
40:224		1
40:226		1
40:273		1
40:334		1
40:36		1
40:382		1
40:385		1
40:420		1
40:421Q		1
40:44		1
40:445		1
40:48		1
40:61		1
40:62		1
40:63		1
40:76		1
40:78		1
40:85		1
40:92		1
40:95		1
41:03:02		1
41:04		1
41:05		1
41:09		1
41:15		1
41:18		1
41:59		1
41:AMAVZ		1
41:AMBAW		1
41:ATGFA		1
41:BZFVD		1
42:04		1
42:09		1
42:10		1
42:13		1
42:18		1
44:02:12		1
44:02:31		1
44:02:36		1
44:02:44		1
44:02:50		1
44:03:28		1
44:03:47		1
44:03:50		1
44:05:02		1
44:102		1
44:103		1
44:104		1
44:107		1
44:109		1
44:126:02		1
44:130		1
44:133		1
44:137		1
44:149N		1
44:16		1
44:166		1
44:168		1
44:186:01		1
44:192:02		1
44:202		1
44:206		1
44:208		1
44:214		1
44:229		1
44:23:01G		1
44:230		1
44:24		1
44:257		1
44:260		1
44:276		1
44:286		1
44:289		1
44:327		1
44:57		1
44:71		1
44:78		1
44:83		1
44:84:02		1
44:97		1
44:98		1
44:AWFFU		1
44:DECSZ		1
44:DEXYW		1
45:01:07		1
45:10		1
45:14		1
46:21:01		1
46:62		1
46:CKSXF		1
47:04		1
47:XXX		1
49:02		1
49:06		1
49:11		1
49:12		1
49:17		1
49:22		1
49:50		1
50:01:05		1
50:06		1
50:34		1
50:BZFVC		1
51:01:20		1
51:01:21		1
51:01:25		1
51:01:28		1
51:01:29		1
51:01:41		1
51:01:66		1
51:06:03		1
51:12		1
51:127		1
51:136		1
51:137		1
51:145		1
51:16		1
51:160		1
51:179		1
51:211		1
51:221		1
51:267		1
51:278		1
51:27N		1
51:283		1
51:29		1
51:33		1
51:37		1
51:42		1
51:44N		1
51:52		1
51:59		1
51:61:02		1
51:63:01		1
51:64		1
51:71		1
51:90		1
51:97		1
51:99		1
51:BJHYX		1
51:BRXMC		1
51:CCYWU		1
51:CEJWM		1
51:CZJDU		1
51:DCHFB		1
51:DEXYV		1
51:DGKFZ		1
52:01:05		1
52:01:06		1
52:01:12		1
52:01:13		1
52:01:14		1
52:03		1
52:08		1
52:10:03		1
52:37		1
52:75		1
52:83		1
52:BYMBK		1
52:DMWTM		1
53:01:03		1
53:01:05		1
53:01:13		1
53:01:20		1
53:09		1
53:13		1
53:18		1
53:28		1
53:31		1
53:33		1
53:58		1
53:EHS		1
55:01:21		1
55:02:02		1
55:103		1
55:14		1
55:21		1
55:31		1
55:60		1
55:74		1
55:78		1
55:84		1
55:90		1
55:95		1
56:01:09		1
56:05:01		1
56:06		1
56:09		1
56:22		1
56:33		1
56:37		1
56:41		1
56:52		1
57:01:05		1
57:01:14		1
57:01:15		1
57:03:02		1
57:03:03		1
57:06		1
57:08		1
57:106		1
57:119		1
57:25		1
57:36		1
57:41		1
57:42		1
57:53		1
57:62		1
57:63		1
57:70		1
57:78		1
57:85		1
57:90		1
57:DEHDK		1
58:01:02		1
58:01:10		1
58:01:11		1
58:09		1
58:28:02		1
58:48		1
58:59:02		1
58:84		1
58:DGKCR		1
81:07		1
