# Supplementary material for: High population frequencies of MICA copy number variations originate from independent recombination events
Source: Research Square preprint supplement (doi:10.21203/rs.3.rs-3192282/v1), 2023-08-16
Supplement: Supplementary file 4 [file be60a9438d169a66699e8561.xlsx]

## Sheet: Sheet1
HLA_B	n_duplicated	n_all	percent_dup
27:157	1	1	100
27:30	6	6	100
27:83	3	3	100
40:114:01	1	1	100
27:02:01G	21678	32222	67.277
15:18:02	1	2	50
14:19	1	4	25
15:154	1	5	20
57:40	1	6	16.6667
07:102	1	7	14.2857
27:05:18G	1	11	9.09091
18:34	1	16	6.25
07:05:02	1	19	5.26316
55:04	1	19	5.26316
56:27	1	20	5
15:135	3	61	4.91803
35:09:02	1	22	4.54545
44:17	1	23	4.34783
18:09	1	24	4.16667
44:21	1	31	3.22581
15:65	1	32	3.125
27:51	1	36	2.77778
18:18:01G	3	109	2.75229
40:32	1	41	2.43902
82:02:01G	1	44	2.27273
35:30:01G	1	51	1.96078
37:04:01	1	51	1.96078
15:31:01G	1	54	1.85185
07:07:01G	2	115	1.73913
18:14	1	64	1.5625
47:02	5	320	1.5625
44:XXX	1	67	1.49254
15:73:01G	1	68	1.47059
35:02:02	3	217	1.38249
07:04:01	61	4497	1.35646
08:01:04	2	151	1.3245
15:09:01G	17	1380	1.23188
51:02:02	1	83	1.20482
47:03	1	84	1.19048
18:05:01G	5	462	1.08225
27:05:03	28	2735	1.02377
40:12:01	1	98	1.02041
15:82	1	99	1.0101
39:31:01G	3	311	0.96463
37:02	1	104	0.961538
18:03:01G	43	4500	0.955556
08:01:02	5	588	0.85034
39:24:01	17	2009	0.846192
44:05:01G	163	20359	0.800629
40:DUKCK	1	127	0.787402
35:19	2	261	0.766284
38:01:01G	722	96712	0.746546
41:02:01G	201	27531	0.730086
13:02:01G	1009	141586	0.712641
39:01:01G	401	56368	0.711397
56:01:01G	263	37143	0.708074
18:01:01G	1454	219228	0.663236
40:02:01G	436	66325	0.657369
44:29:01G	3	461	0.650759
07:15	1	155	0.645161
15:24:01	11	1712	0.642523
35:03:01G	640	100453	0.637114
27:05:02G	930	153477	0.605954
27:14	3	497	0.603622
52:01:01G	317	53825	0.588946
51:01:01G	1412	240822	0.586325
15:01:01G	1554	269633	0.576339
27:09	3	524	0.572519
35:02:01G	215	37871	0.567717
07:02:01G	2949	525998	0.560649
49:01:01G	365	65461	0.557584
41:01:01G	127	22800	0.557018
15:07:01G	12	2177	0.551217
50:01:01G	276	50080	0.551118
35:01:01G	1339	243010	0.551006
44:03:01G	997	185346	0.537913
57:01:01G	790	148790	0.53095
44:04	12	2279	0.526547
15:32:01G	1	190	0.526316
51:08:01G	29	5561	0.521489
35:08:01G	124	23831	0.520331
37:01:01G	299	57755	0.517704
40:01:01G	992	193015	0.51395
35:10	1	197	0.507614
55:01:01G	338	67136	0.503456
08:01:01G	2233	443944	0.502991
39:09:01G	91	18109	0.502513
58:01:01G	203	40897	0.496369
57:03:01G	22	4465	0.492721
15:33	1	205	0.487805
18:04:01	1	205	0.487805
14:02:01G	431	88778	0.485481
73:01:01G	11	2286	0.48119
15:13:01	1	209	0.478469
51:05	8	1674	0.477897
44:02:01G	1586	334140	0.474651
45:01:01G	111	23515	0.472039
15:39:01G	3	640	0.46875
47:01:01G	60	12840	0.46729
51:07:01	15	3221	0.465694
14:01:01G	138	29663	0.465226
15:29:01G	2	431	0.464037
15:17:01G	82	18087	0.453364
08:09	1	221	0.452489
27:10	1	225	0.444444
53:01:01G	77	17665	0.43589
39:06:02G	96	22125	0.433898
07:10	2	467	0.428266
15:05:01	3	728	0.412088
42:01:01G	11	2738	0.401753
07:14:01	1	253	0.395257
15:15:01G	1	253	0.395257
15:11:01G	1	255	0.392157
51:01:02G	1	256	0.390625
46:01:01G	10	2673	0.374111
44:06	1	269	0.371747
15:08:01	5	1348	0.37092
27:07:01G	9	2451	0.367197
07:05:01G	61	16724	0.364745
39:06:01	1	290	0.344828
15:18:01G	32	9406	0.340208
55:02:01G	2	650	0.307692
67:01:02G	1	333	0.3003
35:04:01G	1	335	0.298507
15:03:01G	23	7976	0.288365
39:03:01G	2	697	0.286944
50:02:01G	4	1575	0.253968
15:34:01	1	396	0.252525
52:01:02G	5	2024	0.247036
35:09:01	14	5733	0.2442
81:01:01G	2	836	0.239234
27:03	2	849	0.235571
57:02:01G	3	1342	0.223547
13:01:01G	7	3342	0.209455
78:01:01G	1	478	0.209205
42:02:01G	2	958	0.208768
27:04:01G	1	498	0.200803
39:10:01G	2	1008	0.198413
40:06:01G	28	14334	0.19534
35:20:01	3	1754	0.171038
58:02:01G	3	1775	0.169014
35:05:01G	4	2469	0.162009
44:03:02G	15	10476	0.143184
35:12:01G	1	711	0.140647
40:04:01	1	731	0.136799
15:10:01G	3	2381	0.125997
40:BZDHF	1	864	0.115741
40:BZDHH	1	864	0.115741
15:25:01G	1	867	0.11534
15:04:01G	1	879	0.113766
51:09:01G	1	883	0.11325
15:02:01G	4	3847	0.103977
39:05:01G	2	1956	0.102249
40:DEFZZ	1	1009	0.099108
38:02:01G	2	2077	0.0962927
35:43:01G	1	1187	0.084246
07:02:02		2
07:02:03		59
07:02:04		14
07:02:05		4
07:02:07		15
07:02:08		2
07:02:10		32
07:02:11		1
07:02:12		5
07:02:13		11
07:02:17		4
07:02:21		6
07:02:27		14
07:02:28		2
07:02:34		2
07:02:36		1
07:02:43		5
07:02:44		1
07:02:48		2
07:02:67		4
07:03		96
07:05:05		1
07:07		11
07:07:02		1
07:08:01		19
07:09:01		237
07:104		1
07:105		1
07:109		6
07:112		1
07:114		2
07:12		2
07:122		5
07:127		2
07:13		3
07:134		1
07:136:01		6
07:143		2
07:147		1
07:149		1
07:151:01		1
07:152		1
07:153		1
07:16		20
07:160		1
07:162		1
07:163		2
07:167N		1
07:17		1
07:173		1
07:174		5
07:175		1
07:179		1
07:18:01		10
07:188		2
07:19		1
07:193		1
07:195		3
07:20		19
07:21		2
07:211		1
07:216		1
07:217		2
07:22:01		34
07:22:02		6
07:23		6
07:236		2
07:237		1
07:239		1
07:24		4
07:241		1
07:248		1
07:252		20
07:255		1
07:26		39
07:261		2
07:265		1
07:266		1
07:272N		15
07:277		1
07:280		1
07:287		1
07:288		1
07:29		1
07:300		1
07:303:02		1
07:31		3
07:310		1
07:316N		1
07:33:01		12
07:347		1
07:350		1
07:357		1
07:36		2
07:37:01G		9
07:38		28
07:39		1
07:41		2
07:42		11
07:47		114
07:48		12
07:51		13
07:52		2
07:54		1
07:55		4
07:56:01		2
07:56:02		2
07:57		4
07:62		38
07:63		13
07:67N		6
07:68:01		10
07:68:03		1
07:71		1
07:73		7
07:74		7
07:77		1
07:83		2
07:86		2
07:87		17
07:88		17
07:90		1
07:91		1
07:92		14
07:93		1
07:94		4
07:95		5
07:96:01		9
07:96:02		1
07:98		10
07:ARBNB		1
07:CGXSM		1
07:CXACV		1
07:DETZF		1
07:XXX		59
08:01:03		8
08:01:05		4
08:01:06		6
08:01:07		6
08:01:08		8
08:01:10		4
08:01:13		3
08:01:16		1
08:01:17		1
08:01:21		1
08:01:22		2
08:01:25		1
08:01:31		1
08:01:33		1
08:01:36		2
08:02		6
08:03		1
08:04:01		4
08:07		10
08:104		1
08:108		1
08:11		4
08:110		5
08:111		3
08:112		1
08:113		1
08:12:01		24
08:12:03		2
08:120		3
08:129		2
08:13		3
08:130		1
08:132		2
08:135		1
08:136		1
08:137		1
08:138		1
08:14		7
08:143		1
08:147		1
08:15		11
08:156		1
08:161		6
08:162		1
08:165		1
08:170		1
08:172		1
08:18		162
08:180		1
08:186		1
08:20:01		20
08:21		4
08:22		1
08:23		9
08:24		43
08:25		12
08:26:01		1
08:28		10
08:30N		2
08:31		2
08:33		15
08:34		5
08:35		11
08:37		7
08:39		3
08:41		4
08:43		1
08:47		2
08:50		3
08:52		3
08:59:01		1
08:59:02		1
08:62		1
08:63		5
08:65		1
08:70		1
08:71		9
08:78		1
08:86N		2
08:88		1
08:91		1
08:92		1
08:95		1
08:97		1
08:CEFFH		1
08:CXABC		1
08:XXX		30
13:01:10		1
13:02:02		1
13:02:03		1
13:02:04		5
13:02:06		3
13:02:10		2
13:02:15		1
13:02:17		1
13:02:26		1
13:03		14
13:08		46
13:10		8
13:11		2
13:113		1
13:119		1
13:133		2
13:14		2
13:140		2
13:15		2
13:22:02		1
13:30		1
13:45		5
13:49N		4
13:53		1
13:57		1
13:65		1
13:66		1
13:XXX		10
14:01:04		1
14:02:02		113
14:02:03		5
14:02:07		1
14:02:16		1
14:03		173
14:05		6
14:06:01		14
14:06:02		7
14:07N		8
14:08:01		4
14:10		16
14:13		4
14:14		1
14:18		2
14:20		13
14:23		2
14:29		5
14:31		1
14:36		1
14:63		1
14:95		1
14:XXX		12
15:01:02		26
15:01:03		1
15:01:04		12
15:01:08		2
15:01:09		1
15:01:10		36
15:01:11		1
15:01:12		3
15:01:14		15
15:01:15		4
15:01:16		2
15:01:18		1
15:01:21		2
15:01:31		1
15:01:35		4
15:01:53		1
15:01:55		1
15:03:03		4
15:04:02		1
15:05:02		1
15:06		21
15:101		2
15:106		1
15:108		1
15:110		18
15:113		10
15:116		1
15:117		7
15:12:01G		160
15:122		14
15:123:01G		15
15:125		47
15:125:01		59
15:125:02		1
15:128		2
15:132		9
15:14:01G		26
15:141		3
15:142		10
15:147		10
15:150		2
15:153		23
15:157		8
15:16:01G		1939
15:16:02		1
15:160:01G		6
15:162		1
15:164		10
15:167		3
15:17:02		52
15:170		2
15:171		1
15:172		2
15:173		13
15:174		3
15:175		2
15:18:03		1
15:18:04		1
15:181N		8
15:190N		4
15:193		1
15:197:02		1
15:20		60
15:204		1
15:206		2
15:207		1
15:21:01G		282
15:211		3
15:212		1
15:225		1
15:23		136
15:231		1
15:232		1
15:240		4
15:248		3
15:251:01		1
15:251:03		1
15:252		1
15:27:01		84
15:27:02		2
15:275:02		1
15:288		1
15:289		1
15:290		1
15:294N		1
15:30:01G		190
15:309		2
15:333		2
15:335		1
15:346		1
15:35		411
15:353		1
15:360		1
15:364		1
15:37		33
15:371		1
15:373		1
15:377Q		2
15:38:01		23
15:389		1
15:39:02		2
15:40:01		22
15:406		2
15:409		1
15:415		1
15:42		1
15:430		1
15:432		2
15:44		1
15:448		1
15:45		37
15:452		1
15:46		5
15:47:01		10
15:48		4
15:484		1
15:498		2
15:50		1
15:51		9
15:52		2
15:520Q		1
15:523		1
15:53		3
15:54		2
15:55		9
15:57		3
15:58		6
15:63		63
15:64:01		2
15:64:02		1
15:67		11
15:68		1
15:69		4
15:70		7
15:71		92
15:72		1
15:75		17
15:76		1
15:78:01G		34
15:78:02		2
15:78:03		1
15:79N		11
15:80		2
15:83		1
15:83:01G		1
15:87		1
15:89		1
15:89:01		2
15:97		3
15:AUSKV		1
15:BZBTW		1
15:BZFFW		170
15:BZFFZ		164
15:BZWDG		5
15:CEFER		1
15:CKDZE		2
15:CKDZF		374
15:CKDZH		146
15:CZKMN		2
15:DEHDN		1
15:DEHSG		195
15:DURJU		26
15:XXX		74
18:01:02		45
18:01:06		7
18:01:09		1
18:01:10		6
18:01:12		1
18:01:20		3
18:01:23		1
18:01:30		3
18:02:01		105
18:06		13
18:07:01		66
18:07:02		9
18:08		11
18:11		5
18:113		3
18:115		1
18:117		1
18:12:01		10
18:13		7
18:138N		1
18:142		1
18:147		2
18:15		5
18:157:01G		1
18:19		6
18:20		17
18:25		9
18:26		4
18:28		38
18:29		1
18:31		1
18:33		7
18:36		1
18:37:01		2
18:40		10
18:43		1
18:44:01		1
18:45		1
18:49		2
18:60		2
18:69		2
18:73		1
18:98		1
18:XXX		24
27:01		130
27:04:03		1
27:05:05		4
27:05:07		15
27:05:08		10
27:05:09		13
27:05:15		1
27:05:21		6
27:05:23		1
27:05:24		2
27:05:25		1
27:05:27		1
27:05:33		1
27:05:34		7
27:06:01G		227
27:08		175
27:101		3
27:118		2
27:12:01G		433
27:121		1
27:123		1
27:126		1
27:127		1
27:137		2
27:140		2
27:142		1
27:143		1
27:146		2
27:148		3
27:161		1
27:17		19
27:177		1
27:19:01G		20
27:20		2
27:202		1
27:209		1
27:23		3
27:25		3
27:26		2
27:31		1
27:32		2
27:34		3
27:35		2
27:41		1
27:43		1
27:45		1
27:46		4
27:47		4
27:48		3
27:49		5
27:53		2
27:55		1
27:56		3
27:57		1
27:60		1
27:61		1
27:70		4
27:72		1
27:73		1
27:78		2
27:80		2
27:82		6
27:85		29
27:90:01		1
27:90:04		1
27:91		1
27:96:01		1
27:98		1
27:BYMSH		1
27:XXX		53
35:01:02		2
35:01:05		24
35:01:06		1
35:01:07		2
35:01:10		1
35:01:11		3
35:01:14		1
35:01:19		5
35:01:29		2
35:01:34		1
35:01:42		1
35:01:54		1
35:01:55		1
35:01:56		1
35:01:64		1
35:02:03		1
35:02:04		2
35:02:06		3
35:02:10		1
35:03:02		9
35:03:09		1
35:03:19		1
35:03:25		1
35:04:02		3
35:06		356
35:08:02		15
35:08:04		1
35:08:05		1
35:08:06		1
35:08:12		2
35:100		14
35:101:01		1
35:103		2
35:104		2
35:105		4
35:106		8
35:107		1
35:11:01		51
35:116		2
35:12:04		1
35:124		2
35:129N		1
35:13		15
35:130N		1
35:132		7
35:135		1
35:136		8
35:14:01G		92
35:14:02		18
35:144		2
35:15:01		12
35:150:02		1
35:158		1
35:159		1
35:16		56
35:160		1
35:163		1
35:165N		1
35:167		2
35:17:01G		384
35:171		1
35:174		2
35:175		1
35:178		7
35:18		1
35:180		1
35:181		1
35:182		1
35:183		1
35:193		2
35:194		1
35:199		2
35:20:02		7
35:204		2
35:208:01		2
35:21		158
35:210		1
35:211		1
35:214		2
35:215		1
35:22:01G		85
35:221		1
35:228		1
35:23		14
35:24:01		6
35:240		2
35:242		4
35:247		9
35:248		1
35:25		1
35:258		1
35:259		1
35:262		2
35:263		2
35:266		1
35:27		18
35:278		1
35:28:01G		22
35:280		1
35:285		2
35:289		1
35:29:01		54
35:31		34
35:311		1
35:313		1
35:32:01		20
35:320		1
35:321		32
35:337:02		1
35:34		4
35:351		3
35:36		36
35:37		10
35:38		17
35:395		5
35:396		2
35:407		1
35:41		383
35:412		1
35:42:02		1
35:424		1
35:437		1
35:44		6
35:45		6
35:452		2
35:47		2
35:48		2
35:49:01		8
35:55		9
35:58		2
35:59:01		1
35:61:01		4
35:64:02		1
35:65Q		19
35:68:01		3
35:68:02		13
35:74		3
35:77		38
35:81		2
35:85		3
35:87		1
35:90		1
35:93		1
35:95		2
35:99		15
35:BMMKP		21
35:BPJKN		13
35:BZUVR		21
35:CDHJF		1
35:CDHJG		12
35:CDVKD		1
35:CEFEV		1
35:CKAVK		25
35:DCHCY		25
35:DEHAC		29
35:DGKCT		1
35:DPFDF		4
35:DSNK		1
35:DSZW		1
35:XXX		34
37:01:02		2
37:01:03		28
37:01:06		1
37:01:07		1
37:01:20		7
37:03N		5
37:04:02		8
37:06:01		5
37:06:02		1
37:07		1
37:09		3
37:10		3
37:16Q		1
37:17		8
37:21		5
37:34		1
37:42N		1
37:48		3
37:74		2
37:83		1
37:XXX		21
38:01:06		8
38:01:07		2
38:01:08		1
38:02:02G		72
38:03		2
38:04		1
38:09		44
38:11		1
38:12		11
38:13		5
38:14		1
38:15		1
38:17		7
38:24		1
38:31		10
38:33		1
38:BNRYP		1
38:XXX		13
39:01:04		17
39:01:05		3
39:01:07		1
39:01:08		3
39:01:09		2
39:01:10		4
39:01:14		2
39:01:19		26
39:01:20		1
39:02:01G		2
39:02:02G		182
39:04		5
39:07		12
39:08		145
39:09:02		1
39:102		3
39:11		83
39:111		1
39:112		1
39:12:01G		132
39:123		3
39:13:01		133
39:13:02		15
39:14:01G		150
39:15		32
39:155		10
39:19:01		2
39:20		17
39:22		4
39:24:02		1
39:26		8
39:28		2
39:29		3
39:32		4
39:33		1
39:34		1
39:37		1
39:40:01N		3
39:49		1
39:51		1
39:52		1
39:57		3
39:61		1
39:62		2
39:64		1
39:65		3
39:69		1
39:74		2
39:75		1
39:78		1
39:93		2
39:CZXRS		1
39:XXX		19
40:01:03G		37
40:01:04		80
40:01:05		3
40:01:07		6
40:01:18		2
40:01:20		1
40:01:21		4
40:01:22		1
40:01:23		2
40:01:24		1
40:01:27		1
40:01:32		1
40:01:43		2
40:01:63		1
40:02:06		10
40:02:08		1
40:02:14		8
40:02:15		1
40:02:16		1
40:03:01G		45
40:05:01G		142
40:06:10		1
40:06:19		1
40:07		34
40:08		258
40:09		1
40:10:01G		55
40:102		3
40:103		3
40:105		1
40:108		4
40:11:01G		37
40:11:02		2
40:111		3
40:113		3
40:114:01G		6
40:115		1
40:117		6
40:12		3
40:120		1
40:125:01		3
40:126		4
40:129		1
40:13		111
40:14:02		11
40:14:03		12
40:142N		1
40:145		1
40:148		2
40:157		2
40:16:01G		54
40:160:01		1
40:168		2
40:170		3
40:18		1
40:183		2
40:19		3
40:197		2
40:198		2
40:199		3
40:20:01G		16
40:200		1
40:201		7
40:203		2
40:213		1
40:217		1
40:224		1
40:226		1
40:22N		2
40:23		148
40:26		44
40:27:01		56
40:273		1
40:295		5
40:30		6
40:31		11
40:318		2
40:334		1
40:35:01		2
40:36		1
40:372N		3
40:38		4
40:382		1
40:385		1
40:40:01G		4
40:42		39
40:420		1
40:421Q		1
40:43		5
40:44		1
40:445		1
40:46		2
40:47		2
40:48		1
40:49		17
40:50:01G		68
40:52		2
40:61		1
40:62		2
40:63		2
40:64:01G		48
40:72:02		8
40:76		1
40:78		1
40:79		7
40:85		1
40:87:01		4
40:90		3
40:92		1
40:94		18
40:95		1
40:99		3
40:CKCVN		2
40:CKCVP		712
40:CKCVR		2
40:CKCVS		712
40:DEHAB		881
40:DEHHK		4
40:XXX		32
41:01:05		2
41:03:01		16
41:03:02		1
41:04		1
41:05		1
41:06		35
41:07		6
41:09		1
41:10		2
41:11		3
41:15		1
41:16		4
41:18		1
41:19		2
41:29		1
41:45N		1
41:59		1
41:AMAVZ		1
41:AMBAW		1
41:ATGFA		1
41:BZFVD		1
41:XXX		4
42:04		1
42:05:01		40
42:07		13
42:09		1
42:10		1
42:13		1
42:18		1
44:02:02		5
44:02:05		2
44:02:06		4
44:02:07		6
44:02:09		6
44:02:10		3
44:02:12		1
44:02:18		3
44:02:22		3
44:02:24		2
44:02:31		1
44:02:32		2
44:02:33		2
44:02:34		6
44:02:36		1
44:02:40		2
44:02:44		2
44:02:50		1
44:03:11		3
44:03:13		5
44:03:19		11
44:03:22		2
44:03:28		1
44:03:47		1
44:03:50		1
44:05:02		1
44:07		12
44:08		137
44:09		46
44:10		67
44:102		1
44:103		1
44:104		1
44:107		1
44:109		1
44:111		1
44:115		3
44:116		11
44:120		3
44:122		3
44:126:02		1
44:13		3
44:130		1
44:133		1
44:137		1
44:14		2
44:146		6
44:149N		1
44:15:01G		24
44:152		3
44:16		1
44:166		1
44:168		1
44:173		4
44:177		7
44:18		2
44:186:01		1
44:188		2
44:192:02		1
44:202		1
44:206		1
44:208		1
44:209		2
44:212		3
44:214		1
44:22		3
44:221		6
44:229		1
44:23:01G		1
44:230		1
44:23N		9
44:24		1
44:25		3
44:257		1
44:259		2
44:260		1
44:276		1
44:28:01		2
44:28:02		2
44:286		1
44:288		2
44:289		1
44:30		2
44:308		2
44:31		5
44:32		10
44:327		1
44:333N		2
44:34:01		5
44:36		3
44:37:01		3
44:41:01		13
44:45		5
44:46		3
44:48		6
44:50:01		2
44:51		2
44:57		1
44:64:02		4
44:65		2
44:67		2
44:68		4
44:70		3
44:71		1
44:73		5
44:74		7
44:76		12
44:77		4
44:78		1
44:80		6
44:83		2
44:84:02		1
44:86		8
44:87		5
44:88		1
44:91		7
44:92		4
44:96		5
44:97		1
44:98		1
44:AWFFU		1
44:AYEE		2
44:BNGGP		2
44:BZVUD		13
44:CXHGZ		6
44:CYVH		13
44:DECSZ		1
44:DEHHJ		4
44:DEHTZ		3
44:DEXYW		1
44:DFBMH		10
44:DUKVJ		4
44:FSVJ		2
44:JFVN		15
45:01:07		1
45:10		1
45:14		1
45:XXX		3
46:21:01		1
46:62		1
46:BZUVX		3
46:CKSXF		1
46:CKSXG		7
47:04		1
47:05		2
47:08		2
47:XXX		1
48:01:01G		6460
48:01:08		1
48:02:01		96
48:03:01G		140
48:04:01G		172
48:05		5
48:06		2
48:07		5
48:12		14
48:13		1
48:28		1
48:39		59
48:DEFGW		1
49:02		1
49:06		1
49:09		7
49:10		2
49:11		1
49:12		1
49:16		2
49:17		1
49:22		1
49:50		1
49:CETGF		3
49:CWTKE		13
49:XXX		15
50:01:05		1
50:04		2
50:06		1
50:07		2
50:08		5
50:09		3
50:12		3
50:34		1
50:52		2
50:BZFVC		1
50:CKXGJ		16
50:XXX		4
51:01:03		7
51:01:04		11
51:01:09		7
51:01:10		5
51:01:19		19
51:01:20		1
51:01:21		1
51:01:25		1
51:01:28		1
51:01:29		1
51:01:37		2
51:01:40		2
51:01:41		1
51:01:42		2
51:01:66		1
51:02:01G		452
51:04:01		3
51:06:01		743
51:06:02		4
51:06:03		1
51:09:02		3
51:10		12
51:105		2
51:107		3
51:109		2
51:115		2
51:117		6
51:12		1
51:120		1
51:122		2
51:127		1
51:13:01		65
51:13:02		2
51:131		1
51:134		7
51:136		1
51:137		1
51:14		17
51:145		1
51:147		3
51:15		4
51:158:02		5
51:16		1
51:160		1
51:17		2
51:175		3
51:177		2
51:179		1
51:19		47
51:190		2
51:20		22
51:200		2
51:205		11
51:21		5
51:211		1
51:22		126
51:221		1
51:24:03		3
51:24:04		2
51:26		12
51:267		1
51:278		1
51:27N		1
51:283		1
51:29		1
51:31		83
51:33		1
51:34		8
51:37		1
51:38		25
51:42		1
51:43		25
51:44N		2
51:46		4
51:49		6
51:50		53
51:52		1
51:56:03		3
51:59		1
51:61:01		14
51:61:02		2
51:63:01		1
51:64		1
51:65		35
51:67		5
51:68		10
51:69		16
51:70		7
51:71		1
51:73		2
51:74		3
51:75		15
51:76		4
51:78:01		3
51:82		2
51:83		7
51:87		5
51:90		1
51:97		1
51:99		1
51:BJHYX		1
51:BNTCY		3
51:BRXMC		1
51:BZVFT		3
51:CCYWU		1
51:CEJWM		2
51:CKAVX		3
51:CKAVY		2
51:CWYCT		2
51:CZJDU		1
51:DCHFB		1
51:DEXYV		1
51:DGKFZ		1
51:XXX		38
52:01:05		1
52:01:06		1
52:01:07		5
52:01:12		1
52:01:13		1
52:01:14		1
52:02:01		5
52:03		1
52:04		237
52:06:02		16
52:08		1
52:10:01		2
52:10:03		1
52:11		8
52:25:01		10
52:25:02		2
52:37		1
52:75		1
52:83		1
52:BYMBK		1
52:CJZMT		2
52:DMWTM		1
52:XXX		2
53:01:03		1
53:01:05		1
53:01:13		1
53:01:20		1
53:04		2
53:05:01		58
53:06		23
53:09		1
53:10		2
53:13		2
53:18		1
53:24		3
53:28		1
53:31		1
53:33		1
53:58		1
53:BPJKR		13
53:CDSXZ		36
53:DEHTX		3
53:EHS		1
53:XXX		4
54:01:01G		964
54:XXX		3
55:01:02		42
55:01:04		22
55:01:05		11
55:01:06		13
55:01:15		2
55:01:21		1
55:02:02		1
55:03		6
55:05		14
55:07		4
55:09		19
55:103		2
55:11		7
55:12		5
55:14		1
55:17		12
55:20		2
55:21		1
55:25		18
55:28		1
55:29		6
55:31		1
55:33		3
55:45		5
55:60		1
55:74		2
55:78		1
55:84		1
55:90		1
55:95		1
55:CKAVT		3
55:CKAVU		2
55:XXX		6
56:01:02		7
56:01:03		3
56:01:05		2
56:01:09		1
56:01:12		4
56:02:01		7
56:02:01G		26
56:03		13
56:04:01G		90
56:05:01		1
56:06		1
56:09		1
56:10		2
56:13		2
56:15		7
56:16		7
56:22		1
56:25		10
56:33		1
56:34		3
56:37		1
56:41		1
56:52		1
56:58		2
56:66		2
56:XXX		7
57:01:02		25
57:01:04		2
57:01:05		1
57:01:06		2
57:01:07		5
57:01:10		5
57:01:14		1
57:01:15		1
57:01:20		2
57:03:02		1
57:03:03		1
57:04:01		85
57:05		2
57:06		1
57:08		1
57:106		1
57:11		3
57:119		1
57:131		2
57:14:01		7
57:15		8
57:20		2
57:21		6
57:23		2
57:24		3
57:25		2
57:26		1
57:31		2
57:32		2
57:36		1
57:41		1
57:42		1
57:44		5
57:48		3
57:53		1
57:58		5
57:62		1
57:63		1
57:70		1
57:71		2
57:78		1
57:85		1
57:90		1
57:DEHDK		1
57:XXX		19
58:01:02		1
58:01:03		1
58:01:10		1
58:01:11		1
58:05		15
58:08:01		2
58:09		1
58:18		10
58:23		4
58:28:02		1
58:33		1
58:48		1
58:59:02		1
58:84		1
58:93N		1
58:CDVKB		1
58:DGKCR		1
58:XXX		6
59:01:01G		62
67:01:01		75
67:02:01G		3
78:02:02		57
78:04		5
81:07		1
82:01:01G		95
