# Supplementary material for: High population frequencies of MICA copy number variations originate from independent recombination events
Source: Research Square preprint supplement (doi:10.21203/rs.3.rs-3192282/v1), 2023-08-16
Supplement: Supplementary file 6 [file cc43f7d55c1be895f51907a6.xlsx]

## Sheet: Sheet1
DKMS_Donor_Center	ethnic_group	count_duplicated_samples	count_all_samples	percent_duplicated
DE	Bulgaria	31	1079	2.87303
DE	Croatia	132	4597	2.87144
DE	Poland	572	21946	2.6064
PL	Poland	9448	365946	2.5818
DE	Slovakia	15	644	2.32919
DE	Bosnia and Herzegovina	69	3117	2.21367
CL	Uruguay	1	58	1.72414
DE	Ukraine	40	2352	1.70068
DE	Uzbekistan	5	307	1.62866
DE	Serbia	38	2337	1.62602
DE	Romania	78	4831	1.61457
DE	Albania	21	1325	1.58491
DE	Tajikistan	4	255	1.56863
CL	Cuba	1	64	1.5625
DE	Lithuania	9	589	1.52801
DE	Jamaica	1	66	1.51515
DE	Côte d'Ivoire	1	67	1.49254
DE	Kosovo	29	2022	1.43422
DE	Greece	61	4344	1.40424
DE	Australia	2	143	1.3986
DE	Moldova	4	292	1.36986
DE	Belarus	6	463	1.2959
DE	Montenegro	3	236	1.27119
ZA	White	83	6636	1.25075
DE	Kazakhstan	94	7577	1.2406
CL	Chile Other Indigenous	1	85	1.17647
DE	Hungary	27	2309	1.16934
DE	Cyprus	1	86	1.16279
DE	Russia	179	16162	1.10754
DE	North Macedonia	8	730	1.09589
DE	Czech Republic	21	1922	1.09261
DE	Mozambique	1	93	1.07527
DE	Luxembourg	4	375	1.06667
DE	Bangladesh	1	94	1.06383
DE	Paraguay	1	94	1.06383
DE	Sudan	1	99	1.0101
DE	Slovenia	6	607	0.988468
DE	Germany	9935	1112816	0.89278
DE	Netherlands	20	2255	0.886918
DE	Azerbaijan	2	231	0.865801
DE	Israel	2	242	0.826446
DE	Kenya	2	248	0.806452
DE	Kyrgyzstan	5	675	0.740741
DE	Bolivia	1	138	0.724638
DE	Estonia	1	146	0.684932
DE	Indonesia	2	311	0.643087
DE	Austria	24	3909	0.613968
DE	Argentina	2	352	0.568182
UK	Jewish	2	359	0.557103
US	Asia	2	367	0.544959
DE	Sweden	2	369	0.542005
DE	Ireland	2	393	0.508906
DE	Dominican Republic	1	197	0.507614
DE	Togo	1	206	0.485437
DE	Canada	1	208	0.480769
DE	France	11	2336	0.47089
DE	Belgium	3	642	0.46729
DE	South Korea	2	439	0.455581
DE	Philippines	4	884	0.452489
UK	Turkey	13	2904	0.447658
DE	Switzerland	5	1120	0.446429
CL	Chile Non-Indigenous	292	69899	0.417746
DE	Ethiopia	1	243	0.411523
DE	Georgia	1	244	0.409836
UK	Greece	3	734	0.408719
DE	Turkey	158	38731	0.407942
DE	USA	8	2012	0.397614
DE	Japan	1	259	0.3861
DE	Pakistan	3	784	0.382653
DE	Iraq	4	1062	0.376648
US	White/Caucasian	93	26086	0.356513
DE	Italy	35	9844	0.355547
DE	China	3	871	0.344432
DE	Cuba	1	296	0.337838
DE	Afghanistan	5	1513	0.330469
CL	Chile Mapuche	4	1212	0.330033
DE	Nigeria	2	648	0.308642
DE	Latvia	1	327	0.30581
DE	Brazil	7	2290	0.305677
DE	Great Britain	5	1646	0.303767
DE	Colombia	2	668	0.299401
DE	Thailand	2	673	0.297177
DE	Armenia	1	339	0.294985
US	Vietnam	1	344	0.290698
CL	Argentina	1	360	0.277778
DE	Finland	1	375	0.266667
DE	Syria	14	5370	0.260708
DE	Denmark	1	390	0.25641
DE	Tunisia	2	785	0.254777
DE	Spain	7	2784	0.251437
US	Puerto Rico	2	828	0.241546
DE	Chile	1	417	0.239808
DE	Peru	1	447	0.223714
DE	Portugal	5	2260	0.221239
US	Caribbean (White)	2	920	0.217391
DE	Algeria	1	507	0.197239
DE	Eritrea	1	510	0.196078
UK	Africa Sub-Sahara	3	1645	0.182371
DE	Cameroon	1	601	0.166389
DE	Palestine	1	620	0.16129
US	Black	5	3173	0.15758
UK	South America	1	738	0.135501
DE	Iran	4	3182	0.125707
US	China	1	838	0.119332
UK	Great Britain/Ireland	296	274746	0.107736
US	Mexico	5	5076	0.0985028
IN	India	26	26537	0.0979764
UK	Wales	19	20318	0.0935131
CL	Venezuela	1	1110	0.0900901
DE	India	1	1189	0.0841043
UK	Caribbean (Black)	1	1243	0.0804505
DE	Lebanon	1	1248	0.0801282
UK	Scotland	14	25247	0.0554521
DE	Morocco	1	1809	0.0552792
UK	Northern Ireland	7	19753	0.0354377
UK	Republic of Ireland	1	3113	0.0321234
US	Asia (South)	1	3548	0.0281849
CL	Spain		139
CL	Peru		279
CL	Colombia		473
CL	Ecuador		116
CL	Bolivia		80
CL	Brazil		114
DE	Somalia		131
DE	South Africa		259
DE	Malaysia		106
DE	Jordan		180
DE	Sierra Leone		97
DE	Nepal		62
DE	Uganda		59
DE	Venezuela		192
DE	El Salvador		55
DE	Guatemala		62
DE	Senegal		133
DE	Costa Rica		62
DE	Vietnam		1574
DE	Ecuador		225
DE	Norway		157
DE	Angola		115
DE	Taiwan		121
DE	Yemen		72
DE	Mongolia		70
DE	Gambia		146
DE	Egypt		719
DE	Burundi		57
DE	Congo, Democratic Republic of the		121
DE	Mauritius		56
DE	Mexico		467
DE	Turkmenistan		67
DE	Guinea		94
DE	Namibia		53
DE	Sri Lanka		690
DE	Ghana		570
DE	Uruguay		67
DE	Nicaragua		55
DE	New Zealand		57
DE	Hongkong		90
US	Korea		391
US	Philippines		527
US	Cuba		226
US	Alaska Native or Aleut		57
US	Caribbean (Black)		280
US	Japan		90
US	Africa		588
UK	Asia (East)		156
UK	Thailand, Indonesia, Burma		70
UK	Pakistan		1593
UK	Central America, Mestizo		93
UK	Japan, North Korea, South Korea		80
UK	Bangladesh		409
UK	China, Taiwan		676
UK	Malaysia, Vietnam, Philippines, Cambodia, Laos		381
ZA	Black		377
