# Supplementary material for: High population frequencies of MICA copy number variations originate from independent recombination events
Source: Research Square preprint supplement (doi:10.21203/rs.3.rs-3192282/v1), 2023-08-16
Supplement: Supplementary file 7 [file f1951e4cee085deda1518a49.xlsx]

## Sheet: Tabelle1
Assembly_scc	cell_line	source	region_used
CZVF02000001	WT51	Norman et al.	20kB upstream MICB
CZUK02000001	SSTO	Norman et al.	20kB upstream MICB
NT_167249	SSTO	GRCh38.p14_ALT_REF	20kB upstream MICB
CZSO02000001	DUCAF	Norman et al.	20kB upstream MICB
CZTM02000001	LD2B	Norman et al.	20kB upstream MICB
NT_167248	QBL	GRCh38.p14_ALT_REF	20kB upstream MICB
CZRT02000001	BM15	Norman et al.	20kB upstream MICB
CZTQ02000001	LUY	Norman et al.	20kB upstream MICB
CZUO02000001	SP0010	Norman et al.	20kB upstream MICB
CZUN02000001	RSH	Norman et al.	20kB upstream MICB
CZTX02000001	MT14B	Norman et al.	20kB upstream MICB
NT_167244	APD	GRCh38.p14_ALT_REF	20kB upstream MICB
CZUI02000001	SCHU	Norman et al.	20kB upstream MICB
CZSG02000001	HO104	Norman et al.	20kB upstream MICB
CZTB02000001	BM14	Norman et al.	20kB upstream MICB
NT_167245	DBB	GRCh38.p14_ALT_REF	20kB upstream MICB
CZTL02000001	LKT3	Norman et al.	20kB upstream MICB
CZRV02000001	BTB	Norman et al.	20kB upstream MICB
NT_167247	MCF	GRCh38.p14_ALT_REF	20kB upstream MICB
CZTS02000001	LZL	Norman et al.	20kB upstream MICB
CZTR02000001	MADURA	Norman et al.	20kB upstream MICB
CZVA02000001	WT100BIS	Norman et al.	20kB upstream MICB
CZUD02000001	OMW	Norman et al.	20kB upstream MICB
NT_113891	COX	GRCh38.p14_ALT_REF	20kB upstream MICB
CZUV02000001	VAVY	Norman et al.	20kB upstream MICB
CZRS02000001	ISH3	Norman et al.	20kB upstream MICB
CZTC02000001	KRC005	Norman et al.	20kB upstream MICB
OK649231	APD	Houwaart et al.	20kB upstream MICB
OK649232	DBB	Houwaart et al.	20kB upstream MICB
OK649233	KAS116	Houwaart et al.	20kB upstream MICB
OK649234	MANN	Houwaart et al.	20kB upstream MICB
OK649235	QBL	Houwaart et al.	20kB upstream MICB
OK649236	SSTO	Houwaart et al.	20kB upstream MICB
GRCh38		GRCh38	20kB upstream MICB
GRCh38		GRCh38	20kB upstream MICA
CZSR02000001	KAS116	Norman et al.	20kB upstream MICA
CZSQ02000001	JHAF	Norman et al.	20kB upstream MICA
CZSA02000001	31227ABO	Norman et al.	20kB upstream MICA
CZRZ02000001	BM16	Norman et al.	20kB upstream MICA
CZUL02000001	SLE005	Norman et al.	20kB upstream MICA
CZTR02000001	MADURA	Norman et al.	20kB upstream MICA
NT_167249	SSTO	GRCh38.p14_ALT_REF	20kB upstream MICA
CZTI02000001	AKIBA	Norman et al.	20kB upstream MICA
CZSC02000001	KAWASAKI	Norman et al.	20kB upstream MICA
CZUM02000001	SPL	Norman et al.	20kB upstream MICA
CZTK02000001	CB6B	Norman et al.	20kB upstream MICA
CZSN02000001	BSM	Norman et al.	20kB upstream MICA
CZTW02000001	MCF	Norman et al.	20kB upstream MICA
CZUV02000001	VAVY	Norman et al.	20kB upstream MICA
NT_113891	COX	GRCh38.p14_ALT_REF	20kB upstream MICA
CZSI02000001	LBF	Norman et al.	20kB upstream MICA
CZUA02000001	PF04015	Norman et al.	20kB upstream MICA
CZUB02000001	QBL	Norman et al.	20kB upstream MICA
CZSU02000001	EJ32B	Norman et al.	20kB upstream MICA
NT_167248	QBL	GRCh38.p14_ALT_REF	20kB upstream MICA
CZSO02000001	DUCAF	Norman et al.	20kB upstream MICA
CZTP02000001	L081785	Norman et al.	20kB upstream MICA
CZTT02000001	MGAR	Norman et al.	20kB upstream MICA
CZUC02000001	PGF	Norman et al.	20kB upstream MICA
CZTL02000001	LKT3	Norman et al.	20kB upstream MICA
CZST02000001	BH	Norman et al.	20kB upstream MICA
NT_167246	MANN	GRCh38.p14_ALT_REF	20kB upstream MICA
CZUX02000001	WDV	Norman et al.	20kB upstream MICA
CZSV02000001	DBB	Norman et al.	20kB upstream MICA
CZRV02000001	BTB	Norman et al.	20kB upstream MICA
OK649231	APD	Houwaart et al.	20kB upstream MICA
OK649232	DBB	Houwaart et al.	20kB upstream MICA
OK649233	KAS116	Houwaart et al.	20kB upstream MICA
OK649234	MANN	Houwaart et al.	20kB upstream MICA
OK649235	QBL	Houwaart et al.	20kB upstream MICA
OK649236	SSTO	Houwaart et al.	20kB upstream MICA
